## CORRECTION

# Correction: Enhanced attraction of sand fly vectors of *Leishmania infantum* to dogs infected with zoonotic visceral leishmaniasis

Ifhem Chelbi, Khouloud Maghraoui, Sami Zhioua, Saifedine Cherni, Imen Labidi, Abhay Satoskar, James G. C. Hamilton, Elyes Zhioua

There are errors in the Funding statement. The correct Funding statement is as follows: The authors received no specific funding for this work.

The US National Institutes of Health and the Wellcome Trust did not provide any funding for this research and any such claim was made in error.

There is an error in the Ethics statement. The correct Ethics statement is as follows: The maintenance of animals and the experimental procedures used in this research program followed the Animal Care and Use Protocol which is approved by the Institutional Animal Care and Use Committee of the Institut Pasteur de Tunis, Tunisia (2018/01/I/ES/IPT/V0). Infected dogs used in this research program were obtained from a previous industry sponsored study that was approved by the Institutional Animal Care and Use Committee of the Institut Pasteur de Tunis, Tunisia (IPT/UESV/27/2012). The Institut Pasteur de Tunis complies with the European Directive for the Protection of Vertebrate Animals used for experimental and other scientific purposes (2010/63/EU).

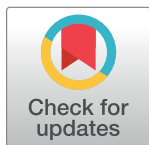

## Reference

1. Chelbi I, Maghraoui K, Zhioua S, Cherni S, Labidi I, Satoskar A, et al. (2021) Enhanced attraction of sand fly vectors of *Leishmania infantum* to dogs infected with zoonotic visceral leishmaniasis. PLoS Negl Trop Dis 15(7): e0009647. <https://doi.org/10.1371/journal.pntd.0009647> PMID: 34314425

## OPEN ACCESS

**Citation:** Chelbi I, Maghraoui K, Zhioua S, Cherni S, Labidi I, Satoskar A, et al. (2021) Correction: Enhanced attraction of sand fly vectors of *Leishmania infantum* to dogs infected with zoonotic visceral leishmaniasis. PLoS Negl Trop Dis 15(11): e0009947. <https://doi.org/10.1371/journal.pntd.0009947>

**Published:** November 11, 2021

**Copyright:** © 2021 Chelbi et al. This is an open access article distributed under the terms of the [Creative Commons Attribution License](https://creativecommons.org/licenses/by/4.0/), which permits unrestricted use, distribution, and reproduction in any medium, provided the original author and source are credited.
